# Supplementary material
Source: PubMed Central journal article supplement (PMC8670841)
Supplement: jci-131-155114-s164.pdf [file jci-131-155114-s164.pdf]

## Supplemental Materials

**Table S1. Baseline characteristics stratified by treatment arm and 28-day survival status**

| Baseline characteristic  |                  | Control Arm, N =39 |                 | Plasma Arm, N = 40 |                |
|--------------------------|------------------|--------------------|-----------------|--------------------|----------------|
|                          |                  | Survival<br>N = 29 | Death<br>N = 10 | Survival<br>N = 38 | Death<br>N = 2 |
| Enrollment               | May-Jun 2020     | 8                  | 2               | 9                  | 0              |
|                          | Jul-Aug 2020     | 8                  | 1               | 10                 | 0              |
|                          | Sep-Oct 2020     | 3                  | 2               | 5                  | 0              |
|                          | Nov-Jan 2021     | 10                 | 5               | 14                 | 2              |
| Sex                      | Female           | 19                 | 5               | 18                 | 1              |
|                          | Male             | 10                 | 5               | 20                 | 1              |
| Age                      | <45              | 2                  | 0               | 10                 | 0              |
|                          | 45-60            | 12                 | 3               | 6                  | 0              |
|                          | 61-74            | 10                 | 2               | 13                 | 1              |
|                          | 75+              | 5                  | 5               | 9                  | 1              |
| Race                     | African American | 18                 | 3               | 21                 | 0              |
|                          | Caucasian        | 10                 | 6               | 12                 | 2              |
|                          | Other/Unknown    | 1                  | 1               | 5                  | 0              |
| SARS-CoV-2 Serostatus    | Negative         | 16                 | 8               | 21                 | 2              |
|                          | Positive         | 13                 | 2               | 17                 | 0              |
| Blood type               | A, B, AB         | 16                 | 5               | 14                 | 1              |
|                          | O                | 13                 | 5               | 24                 | 1              |
| Obesity                  | No               | 12                 | 7               | 22                 | 2              |
|                          | Yes              | 17                 | 3               | 16                 | 0              |
| Hypertension             | No               | 7                  | 2               | 15                 | 2              |
|                          | Yes              | 22                 | 8               | 23                 | 0              |
| Diabetes                 | No               | 16                 | 4               | 25                 | 2              |
|                          | Yes              | 13                 | 6               | 13                 | 0              |
| Congestive Heart Failure | No               | 27                 | 9               | 30                 | 1              |
|                          | Yes              | 2                  | 1               | 8                  | 1              |
| Chronic Kidney Disease   | No               | 18                 | 6               | 27                 | 2              |
|                          | Yes              | 11                 | 4               | 11                 | 0              |
| Cancer                   | No               | 22                 | 6               | 29                 | 1              |
|                          | Yes              | 7                  | 4               | 9                  | 1              |
| Immune Deficiency        | No               | 24                 | 9               | 33                 | 2              |
|                          | Yes              | 5                  | 1               | 5                  | 0              |

|                         |           |    |    |    |   |
|-------------------------|-----------|----|----|----|---|
| Number of comorbidities | 0 or 1    | 2  | 0  | 12 | 2 |
|                         | 2 or more | 27 | 10 | 26 | 0 |
| Steroid use             | No        | 4  | 0  | 9  | 0 |
|                         | Yes       | 25 | 10 | 29 | 2 |
| Anti-thrombotic use     | No        | 10 | 3  | 26 | 1 |
|                         | Yes       | 19 | 7  | 12 | 1 |

---

**Table S2. Comparison of the treatment effect in Cox regression model for mortality censored at 28 days, adjusted versus unadjusted – where each baseline factor was added one at a time.**

|                                        | Treatment Effect  |         |
|----------------------------------------|-------------------|---------|
|                                        | HR (95% CI)       | P-value |
| <b>Unadjusted Model</b>                | 0.19 (0.04, 0.84) | 0.029   |
|                                        |                   |         |
| Adjusted for Enrollment                | 0.18 (0.04, 0.81) | 0.026   |
| Adjusted for Male Sex                  | 0.17 (0.04, 0.80) | 0.024   |
| Adjusted for Age                       | 0.18 (0.04, 0.80) | 0.025   |
| Adjusted for Race                      | 0.18 (0.04, 0.86) | 0.031   |
| Adjusted for SARS-CoV-2 Seronegativity | 0.19 (0.04, 0.86) | 0.031   |
| Adjusted for O Blood type              | 0.18 (0.04, 0.85) | 0.030   |
| Adjusted for Obesity                   | 0.16 (0.04, 0.75) | 0.020   |
| Adjusted for Hypertension              | 0.18 (0.04, 0.81) | 0.026   |
| Adjusted for Diabetes                  | 0.19 (0.04, 0.87) | 0.033   |
| Adjusted for Congestive Heart Failure  | 0.16 (0.03, 0.76) | 0.021   |
| Adjusted for Chronic Kidney Disease    | 0.18 (0.04, 0.84) | 0.029   |
| Adjusted for Cancer                    | 0.19 (0.04, 0.86) | 0.032   |
| Adjusted for Immune Deficiency         | 0.18 (0.04, 0.83) | 0.028   |
| Adjusted for 2 or more comorbidities   | 0.15 (0.03, 0.77) | 0.023   |
| Adjusted for Steroid use               | 0.22 (0.05, 0.98) | 0.047   |
| Adjusted for Anti-thrombotic use       | 0.21 (0.04, 0.99) | 0.048   |

\*Steroid use model was degenerate. All deaths were in those with steroid use in both plasma and control

\* Age used 3 categories (<=60 61-74 75+), due to no deaths in the <45 category; race used 3 categories (African American, Caucasian, Other/Unknown)

**Table S3. Comparison of the treatment effect in a linear regression model for the ranks of the severity score adjusted versus unadjusted – where each baseline factor was added one at a time.**

|                                        | Treatment Effect       |         |
|----------------------------------------|------------------------|---------|
|                                        | $\beta$ (95% CI)       | P-value |
| <b>Unadjusted Model</b>                | -10.79 (-20.68, -0.89) | 0.036   |
| <b>Adjusted Models</b>                 |                        |         |
| Adjusted for Enrollment                | -10.65 (-20.56, -0.75) | 0.038   |
| Adjusted for Male Sex                  | -10.55 (-20.60, -0.50) | 0.043   |
| Adjusted for Age                       | -10.94 (-20.47, -1.42) | 0.027   |
| Adjusted for Race                      | -11.58 (-21.61, -1.56) | 0.026   |
| Adjusted for SARS-CoV-2 Seronegativity | -10.26 (-19.81, -0.71) | 0.038   |
| Adjusted for O Blood type              | -10.62 (-20.71, -0.52) | 0.043   |
| Adjusted for Obesity                   | -11.72 (-21.57, -1.86) | 0.022   |
| Adjusted for Hypertension              | -9.76 (-19.88, 0.36)   | 0.062   |
| Adjusted for Diabetes                  | -10.38 (-20.46, -0.30) | 0.047   |
| Adjusted for Congestive Heart Failure  | -11.55 (-21.69, -1.40) | 0.029   |
| Adjusted for Chronic Kidney Disease    | -10.36 (-20.36, -0.37) | 0.046   |
| Adjusted for Cancer                    | -10.78 (-20.74, -0.81) | 0.037   |
| Adjusted for Immune Deficiency         | -10.60 (-20.52, -0.68) | 0.040   |
| Adjusted for 2 or more comorbidities   | -10.42 (-21.15, 0.30)  | 0.061   |
| Adjusted for Steroid use               | -11.41 (-21.48, -1.35) | 0.029   |
| Adjusted for Anti-thrombotic use       | -11.12 (-21.72, -0.53) | 0.043   |

**Figure S1. Kaplan-Meier survival curves censored at Day 28 by treatment arm (top panel; log-rank test p value= 0.013). Cumulative incidence curves for discharge (bottom panel; p value = 0.006).**

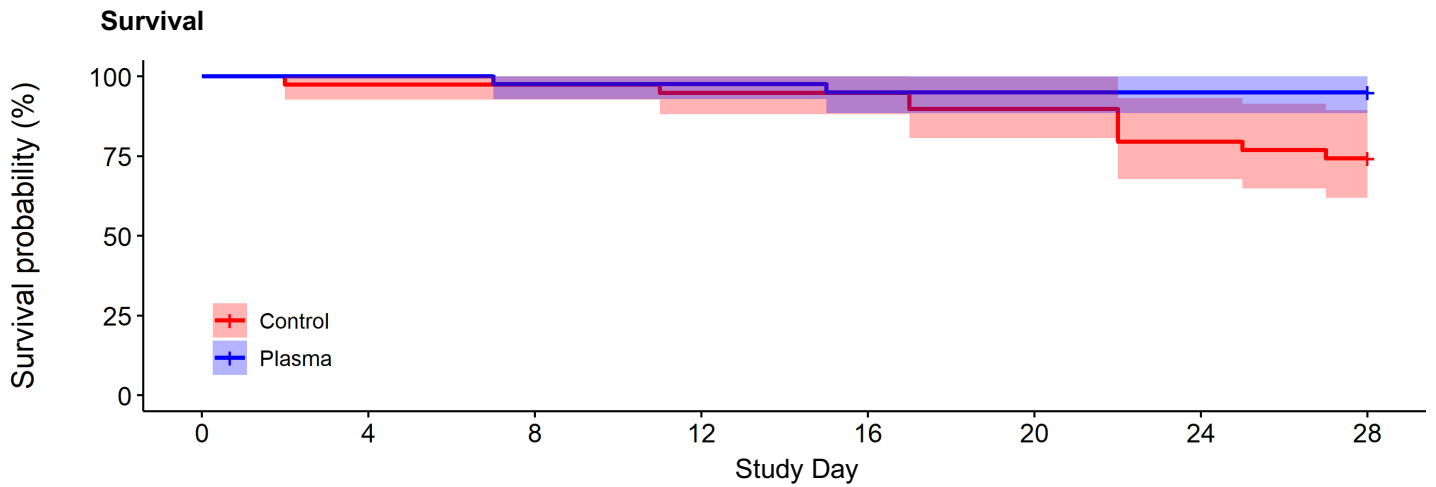

**Number at Risk**

|         | 0  | 4  | 8  | 12 | 16 | 20 | 24 | 28 |
|---------|----|----|----|----|----|----|----|----|
| Control | 39 | 38 | 38 | 37 | 37 | 35 | 31 | 29 |
| Plasma  | 40 | 40 | 39 | 39 | 38 | 38 | 38 | 38 |

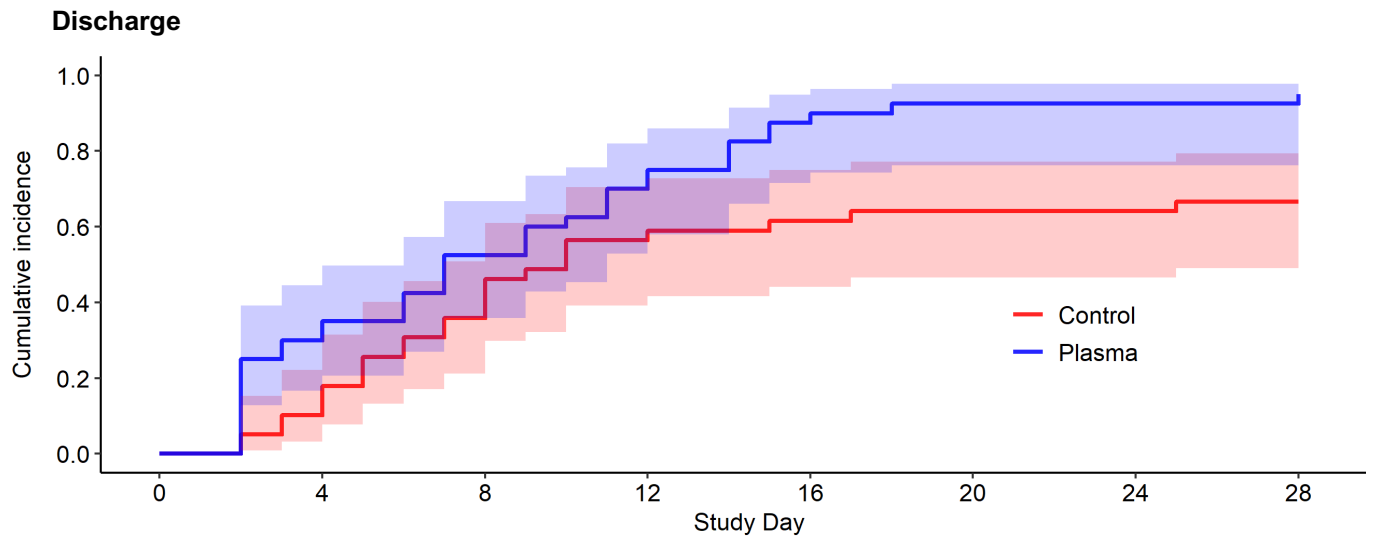

**Number at Risk**

|         | 0  | 4  | 8  | 12 | 16 | 20 | 24 | 28 |
|---------|----|----|----|----|----|----|----|----|
| Control | 39 | 34 | 24 | 15 | 13 | 10 | 6  | 3  |
| Plasma  | 40 | 28 | 18 | 11 | 3  | 1  | 1  | 1  |

**Figure S2. Donor plasma anti-SARS-CoV-2 RBD IgG levels.**

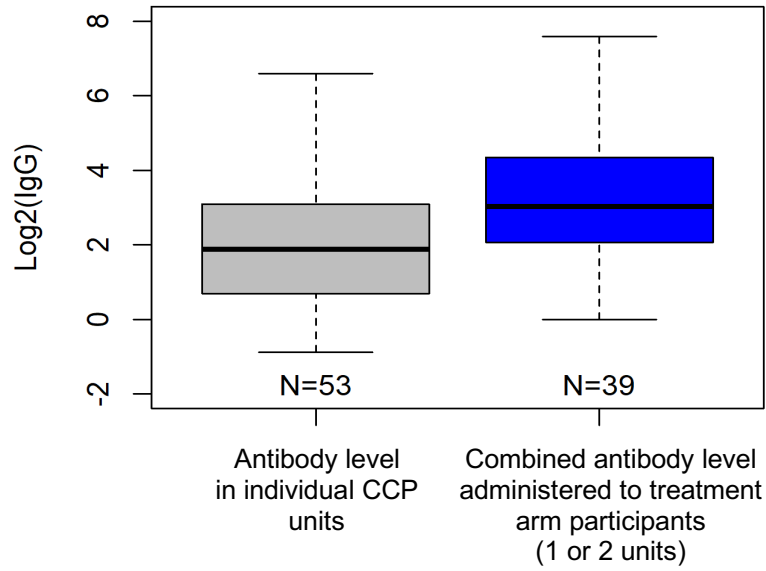

Median (IQR) of anti-SARS-CoV-2 RBD antibody levels measured in plasma from each of the CCP units used in the study (at left) and the median (IQR) of the combined antibody levels received by each of the 39 plasma recipients (in the one or two donor units administered) in the treatment arm (at right).

**Figure S3. Correlation between in house and commercial (Beckman and Euroimmun) anti-SARS-CoV-2 RBD IgG assays.**

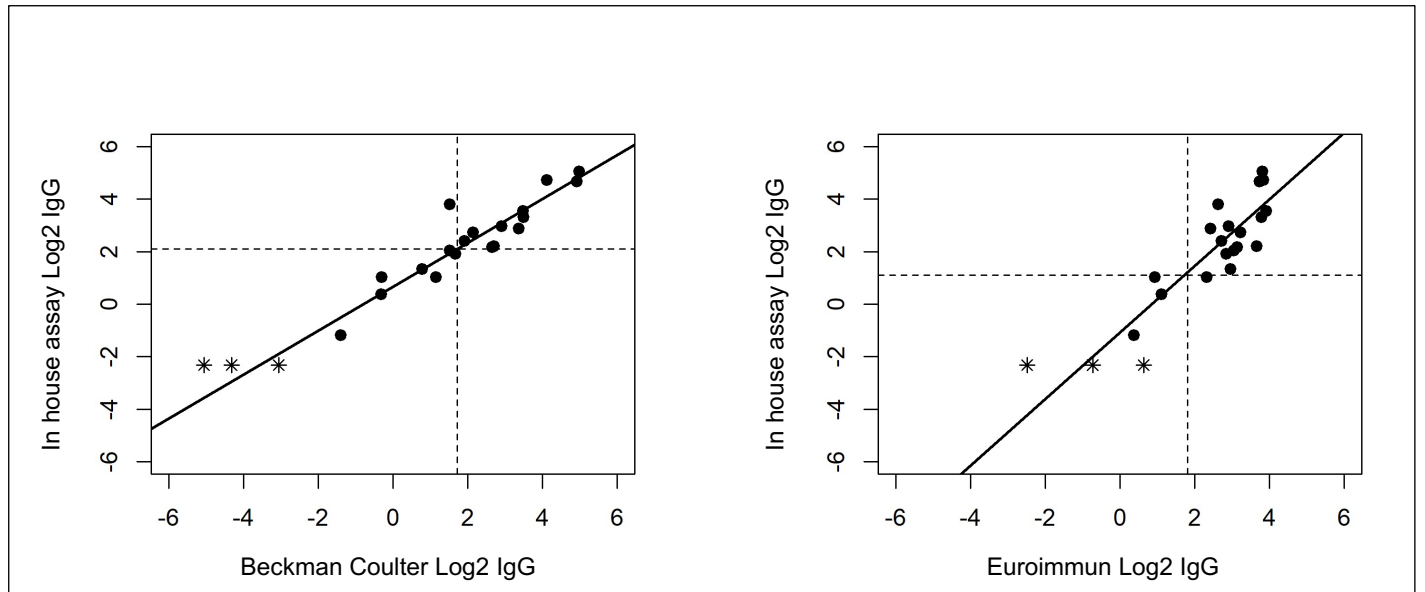

Comparisons of the anti-RBD SARS-CoV-2 antibody titers as measured by in-house anti-RBD assay[19] (Y-axis) and two FDA-approved commercial assays, Beckman Coulter (left) and Euroimmun (right). Vertical dashed lines are at defined commercial assay cutoffs for “high-titer” plasma of  $\log_2(3.3) = 1.722$  and  $\log_2(3.5) = 1.807$  for Beckman Coulter and Euroimmun, respectively. Solid line is the linear model predicting the in-house assay levels, displayed as  $\log_2$  IgG, excluding the three \* points that are plasmas with undetectable values by this platform,  $\log_2(0.20) = -2.322$ . The horizontal dashed lines are the estimated high-titer cutoff value for the in-house assay level equivalents of  $\log_2(4.296) = 2.103$  and  $\log_2(2.153) = 1.106$  by Beckman Coulter and Euroimmun, respectively.



**Figure S4. Anti-SARS-CoV-2 levels**

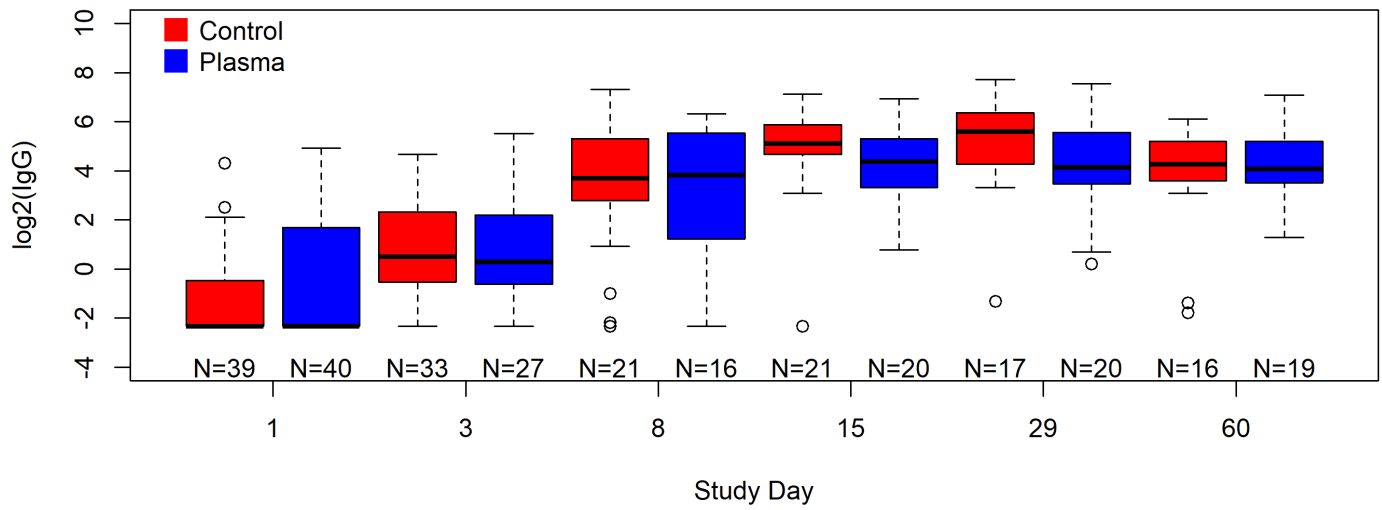

The median and IQR of anti-SARS-CoV-2 antibody levels were measured in available plasmas at baseline and study days 3, 8, 15, 29 and 60, segregated by control arm participants (red) and treatment arm participants (blue).

## Statistical Analysis Plan for CCP2

### Section 1. Clinical Endpoints

#### Primary Endpoint

Clinical severity score based on death and recovery endpoints (see Section 2)

#### Secondary Endpoints

- 14-Day Mortality (binary endpoint)
- Day 14 WHO8 score
- 28-Day Mortality (binary endpoint)
- Day 28 WHO8 score
- Receipt of mechanical ventilation in-hospital through day of discharge/Day 28
- Number of days on Mechanical ventilation in-hospital through discharge/Day 28
- Number of days of oxygen support in-hospital up to discharge/Day 28
- Maximum grade AE through Day 28
- Numbers of AE through Day 28
- Time to death, censored at Day 28
- Time to discharge, censored at Day 28

### Section 2. Calculation of primary endpoint statistical severity score.

This calculation follows Shaw and Fay (Statistics and Medicine, 2016). Let

$\Delta_{\text{death}28}$  = binary indicator if died before day 28

$\Delta_{\text{disch}28}$  = binary indicator if recovered (discharge or WHO8=3 or less) by day 28

$tt_{\text{death}}$  = day of death

$tt_{\text{discharge}}$  = day of recovery (discharge or first day WHO8=3 or less)

If there are no ties for day of death or day of discharge this is what it will be:

$$\text{Severity\_score} = \Delta_{\text{discharge}28} * (tt_{\text{discharge}}) + (1-\Delta_{\text{discharge}28}) * (1-\Delta_{\text{death}28}) * 29 + (1-\Delta_{\text{discharge}28}) * \Delta_{\text{death}28} * (29 + (29-tt_{\text{death}})) \quad (\text{Eq 1})$$

Thus, if recovered on or before day 28, and surviving through Day 28, gets a score of 1-28; the best score (least severe) is a 1 and goes to the person who recovered on Day 1.

For someone who is alive but still in hospital at day 28 with WHO8 score >3, the clinical severity score is 29.

Next worse score is 30, which is if you died on day 28

Absolute worst severity score is 57 (29+28), which is if died on day 1.

Examples: Here are 7 people, using formula

Patient 1, died day 1, score= 57

Patient 2 died day 12, score = 29+(29-12)= 46

Patient 3 died day 28, score = 29+ (29-28)= 30

Patient 4 in hospital alive day 28, score= 29

Patient 5 recovered day 28, score= 28

Patient 6 recovered day 12, score= 12

Patient 7 recovered day 1, score= 1

According to this formula (Eq 1), all deaths have a higher severity score compared to those who survive; quicker deaths have a worse score (larger rank); quicker recovery/discharges have a better score (lower rank).

*Severity score in case of ties amongst survivors (clinical severity score <30):*

For patients who die on same day or recover on the same day, their severity with no further modification would be tied. For purposes of ranking patients, the clinical severity score, in cases of ties amongst survivors, will be further refined by considering other endpoints in a prioritized fashion, according to this order, stopping once the time has been broken.

1. Max WHO8 score while in-hospital between Day 1 and first of (day of discharge, day 28)
2. Number of days on any O2 support while in-hospital between Day 1 and first of (day of discharge, day 28)
3. Numbers of days on mechanical ventilation between Day 1 and first of (day of discharge, day 28)
4. Highest grade AE between Day 1 and first of (day of discharge, day 28)
5. Total number of AE reported and first of (day of discharge, day 28)

**Example**

Suppose there are exactly two patients, Patients 1 and 2, who both recover on Day 26. This means that according to Eq 1, two patients have a clinical severity score of 26. Suppose the worst WHO8 score is a 7 for both of these patients. Thus, we move onto endpoint #2, Days of oxygen support, in order to break the tie in clinical severity. If Patient 1 had 18 days of oxygen support and Patient 2 had 23 days of oxygen support, then Patient 1 would get a score of 26 and Patient 2 would get a score of 26.5. In this manner, Patient 1 has a better (lower) clinical severity score than Patient 2. Because we will analyze these scores using a non-parametric Wilcoxon rank sum test, the size of the difference between the scores is not important, only that the scores will result in a clear ranking of better or worse (i.e.,  $26 < 26.5$ ), while preserving the overall order with respect to the other patients who survived longer or shorter amount of time.

*Missing Data in Survival status*

In the MITT cohort (N=79), all but 2 subjects had complete information for their Day 29 Study visit. Subject 21 did not receive study treatment and withdrew on Study Day 9, the day of discharge. Subject 21 is assumed to have survived through Day 28. A second subject (Subject 71) had a WHO8 score of 1 on Day 15 and a WHO8 score of 1 on Day 60.

**Section 3. Statistical tests for unadjusted treatment comparisons**

Note one randomized person (subject 43) dropped out on Day 1 (day of randomization) without any treatment. This person is excluded from the modified intent to treat analysis (MITT, N=79). Some imputation is needed. Subject 21 discharged and withdrew on Day 9, they will be assumed to live through day 28 for the primary analysis. Sensitivity analyses will also be considered.

**Table 1 Unadjusted statistics.**

| Endpoint                | Statistical test                                         | Missing data Comments                                                                                                                                                                             |
|-------------------------|----------------------------------------------------------|---------------------------------------------------------------------------------------------------------------------------------------------------------------------------------------------------|
| <b>Primary</b>          |                                                          |                                                                                                                                                                                                   |
| Clinical severity score | Wilcoxon rank sum, asymptotic p-value                    | Assume early withdraw survives 28 days. Pt 21                                                                                                                                                     |
| <b>Secondary</b>        |                                                          |                                                                                                                                                                                                   |
| 14-day mortality        | Fisher's exact; Clopper-Pearson 95% confidence intervals | Assume early withdraw survives 28 days. Pt 21                                                                                                                                                     |
| Day 14 WHO8 score       | Proportional odds model                                  | Assume early withdraw survives 28 days. Pt 21 withdrew on day 9<br>Impute day of discharge (DOD) score as Day 14 WHO8 score if missing this score.<br>Pt 21, missing day 14 WHO8, impute DOD WHO8 |

|                                                                                                                     |                                                                                                                                |                                                                                                                                                                                                                                                                                                                                                                                            |
|---------------------------------------------------------------------------------------------------------------------|--------------------------------------------------------------------------------------------------------------------------------|--------------------------------------------------------------------------------------------------------------------------------------------------------------------------------------------------------------------------------------------------------------------------------------------------------------------------------------------------------------------------------------------|
| 28-day mortality                                                                                                    | Fisher's exact;<br>Clopper-Pearson<br>95%<br>confidence intervals                                                              | Assume early withdraw survives 28 days.<br>Pt 21                                                                                                                                                                                                                                                                                                                                           |
| Day 28 Who 8 score.                                                                                                 | Proportional odds<br>model                                                                                                     | Assume early withdraw survives 28 days.<br>Impute closest of Day of discharge (DOD) score<br>or Day 14 as Day 28 WHO8 score if missing this<br>score.<br>Pt 21: use DOD WHO8                                                                                                                                                                                                               |
| % receiving Mechanical<br>ventilation in-hospital:<br>at any time between<br>Day 1 and first of day<br>28/discharge | Fisher's exact;<br>Clopper-Pearson<br>95%<br>confidence intervals                                                              | No missing data                                                                                                                                                                                                                                                                                                                                                                            |
| Days of mechanical<br>ventilation (MV)                                                                              | Lachenbruch test<br>(SMMR 2002)                                                                                                | Days censored at Day 28, For Lachenbruch, add<br>together chi-squared test for proportion who had<br>any MV + Wilcoxon for number of MV days, and<br>compare to a chi-squared 2 (5.99 is critical value<br>for 0.05) If the two tests (proportion & Wilcoxon,<br>are in different directions for the two groups then<br>use the vaccine two-part randomization test of<br>Proschan and Hu. |
| Days of any Oxygen<br>support in hospital: up to<br>first of day of discharge<br>or Day 28                          | Wilcoxon                                                                                                                       | No missing data                                                                                                                                                                                                                                                                                                                                                                            |
| Maximum grade AE per<br>subj                                                                                        | Proportional odds<br>model                                                                                                     | Count max AE grade observed through Day 28.                                                                                                                                                                                                                                                                                                                                                |
| Numbers of AE per subj<br>through Day 28                                                                            | Lachenbruch test                                                                                                               | Count AE through Day 28,<br>For Lachenbruch, Add together chi-squared test<br>for proportion who had any AE + Wilcoxon for<br>number of AE. and compare to a chisquared 2<br>(5.99 is critical value for 0.05) If the two tests<br>(proportion & Wilcoxon, are in different directions<br>for the two groups then use the vaccine two-part<br>randomization test of Proschan and Hu.       |
| Time to death, censored<br>at Day 28                                                                                | Log rank; HR and<br>pvalue can be from<br>log-rank test.                                                                       | Note: 1 person imputed to survival to Day 28 (Pt<br>21 withdrew on DOD, Day 9). Then no missing<br>data for survival data in analysis of time to death<br>censored at Day 28, can use traditional Kaplan-<br>Meier curve and Peto-Peto logrank test (rho=1 in<br>survdiff).                                                                                                                |
| Time to discharge,<br>censored at Day 28                                                                            | Wald test for the HR<br>from the cause<br>specific Cox<br>proportional hazards<br>model, treating death<br>as a competing risk | Need to plot cumulative incidence curves for<br>time to discharge, but interested in the cause-<br>specific HR and p-value, and not the Gray's test.                                                                                                                                                                                                                                       |
| <b>Exploratory/supportive</b>                                                                                       |                                                                                                                                |                                                                                                                                                                                                                                                                                                                                                                                            |
| Oxygen support as a 3-<br>level ordinal variable:<br>None, non-invasive,<br>invasive                                | Proportional odds<br>model, with linear<br>treatment effect                                                                    | Optional model to gain insight if want more<br>complete description on tx effect on oxygen<br>support. Does treatment increase the odds of<br>higher level of support.                                                                                                                                                                                                                     |
